# Supplementary material
Source: publisher site journal article supplement (https://www.spandidos-publications.com/1838/downloadSupplementary)

Figure S1. Mineralization staining in the presence of different concentrations of MEL in hOB cells. Mineralization was assessed in hOB cells following treatment with 0.2, 1.0 or 2.0  $\mu\text{M}$  MEL. \* $P < 0.05$ . MEL, melatonin; hOB; human jawbone-derived osteoblast-like

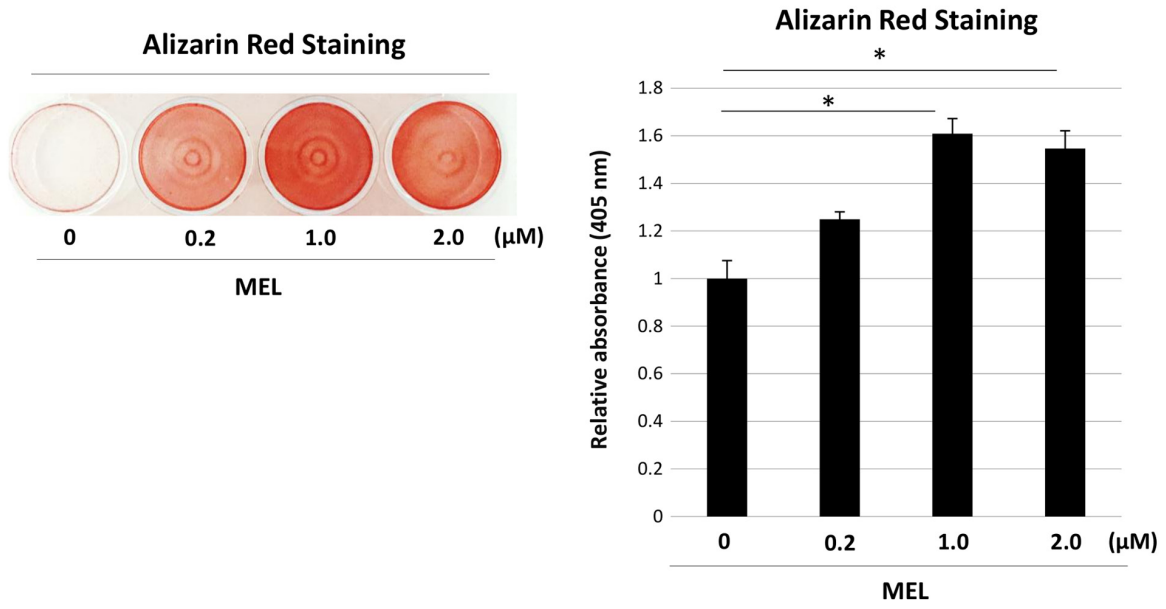

Figure S2. Phosphorylation levels of ERK1 and ERK2 in the presence of TGF- $\beta$ 1 and ERK inhibitor in human jawbone-derived osteoblast-like cells. (A) WB of ERK1 and ERK2 in the presence of TGF- $\beta$ 1 and ERK inhibitor. (B) Phosphorylation levels of ERK1 and ERK2 in the presence of TGF- $\beta$ 1 and ERK inhibitor. \* $P < 0.05$ . WB, western blotting; TGF- $\beta$ 1, transforming growth factor- $\beta$ 1; p-, phosphorylated.

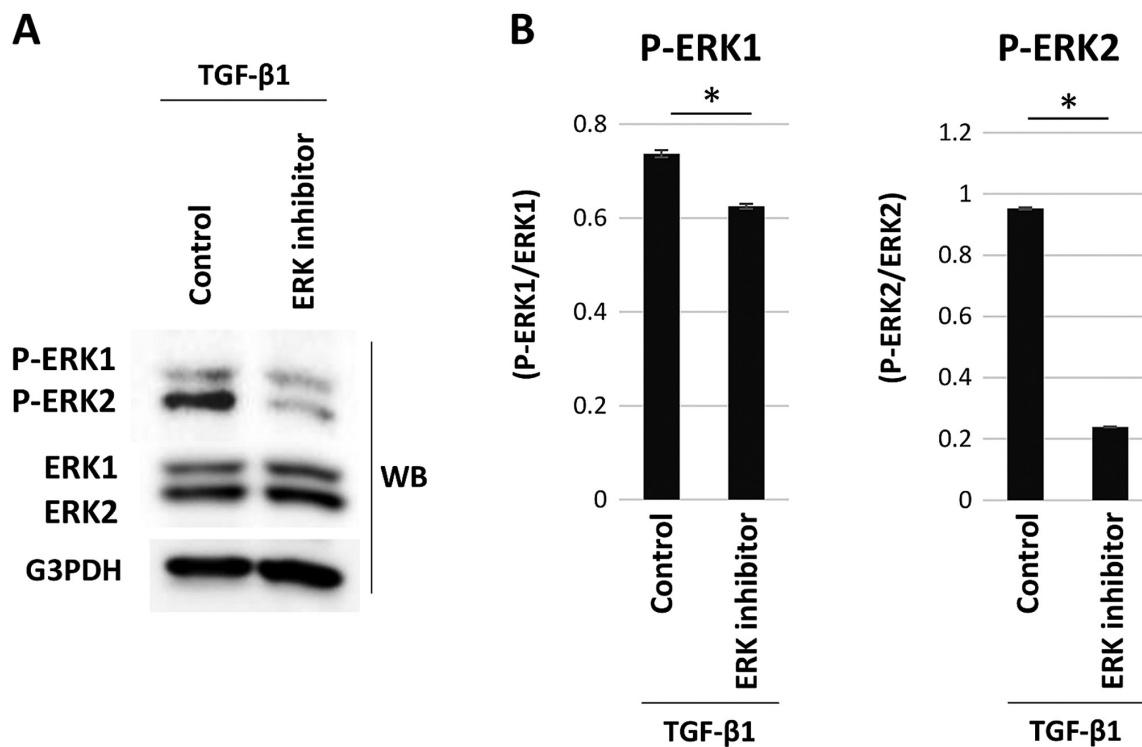

Supplement: Supplementary file 1 [file downloadSupplementary]
